# Supplementary material
Source: PubMed Central journal article supplement (PMC9677345)

# Appendix A

## Biomechanical Differences on ACLR Side

### Double Leg Drop Jump

#### Knee Flexion Angle

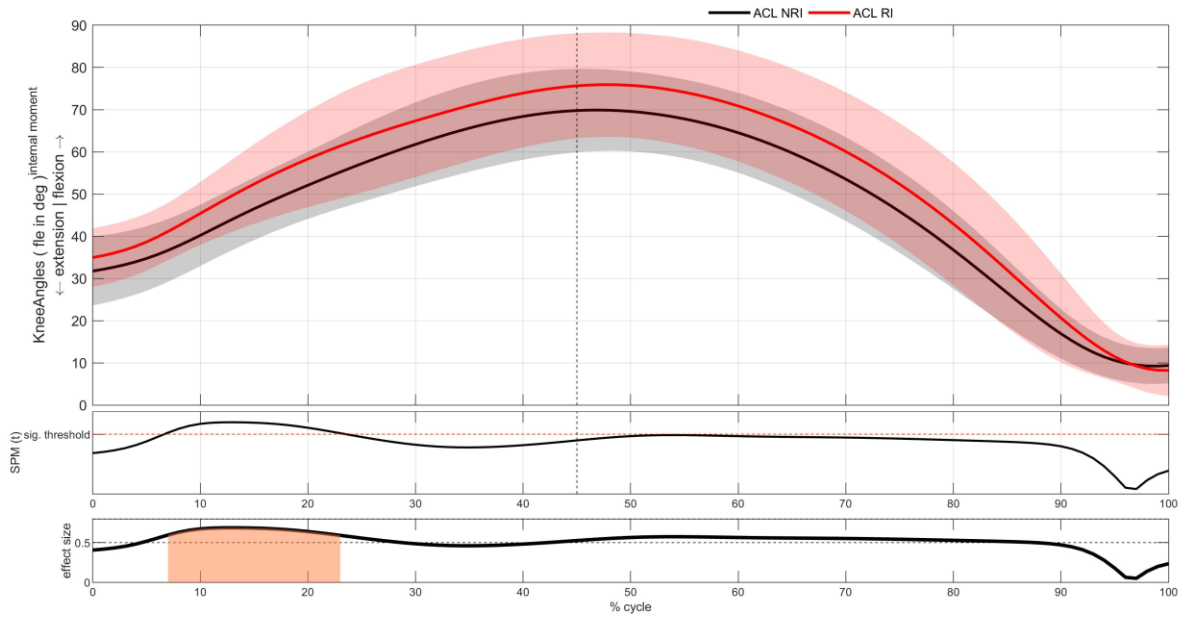

#### COM to Ankle Vertical

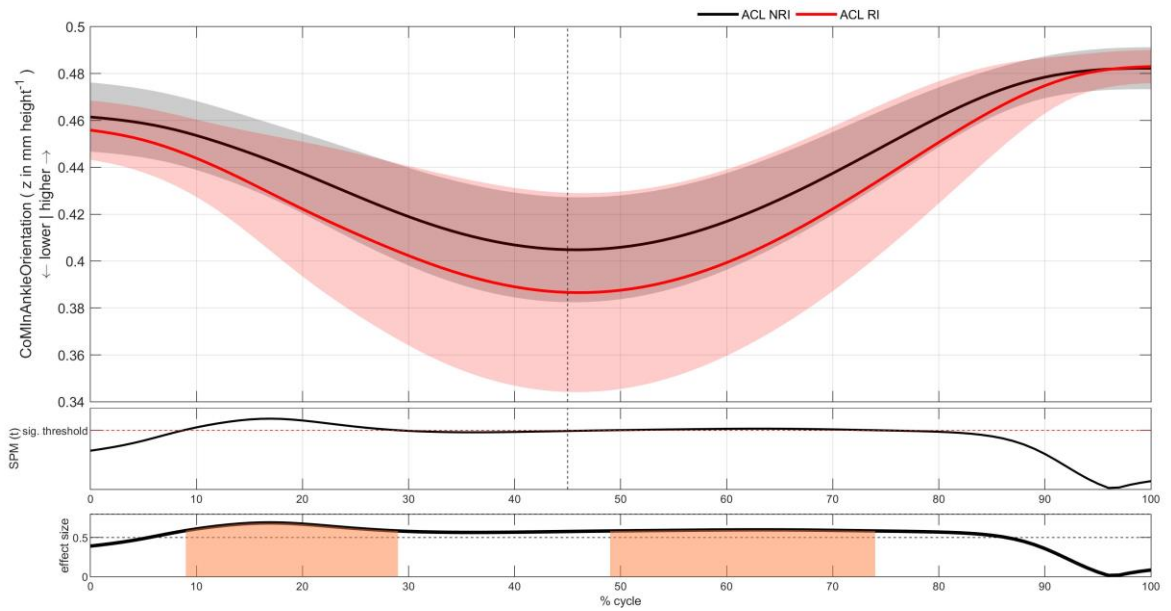

## Planned CoD

### COM to Knee Sagittal

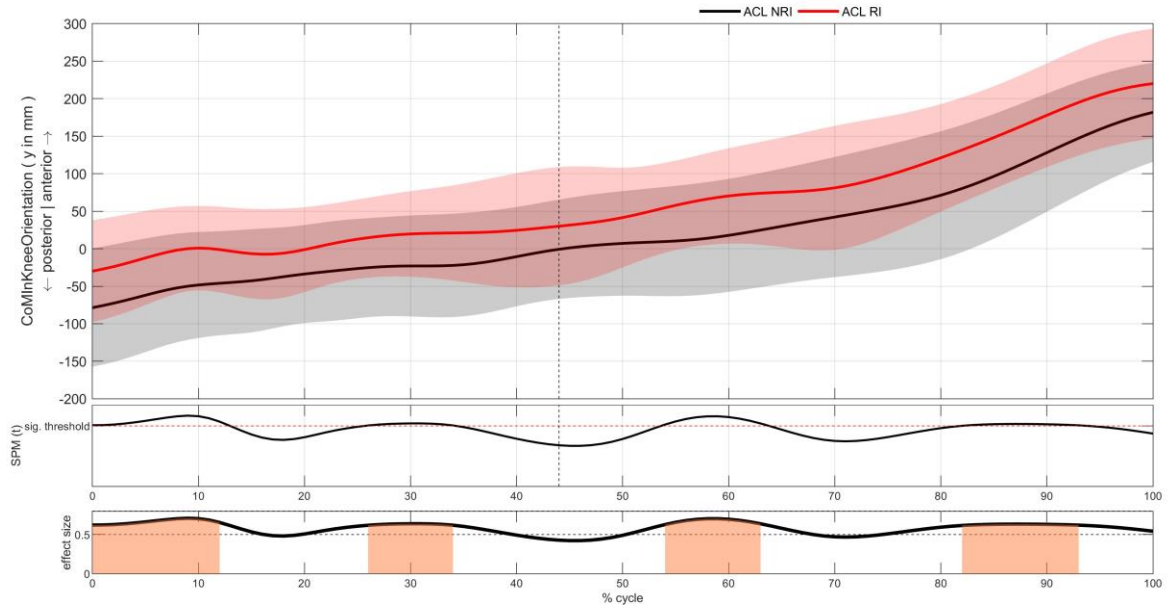

## Unplanned CoD

### Anterior Pelvic Tilt

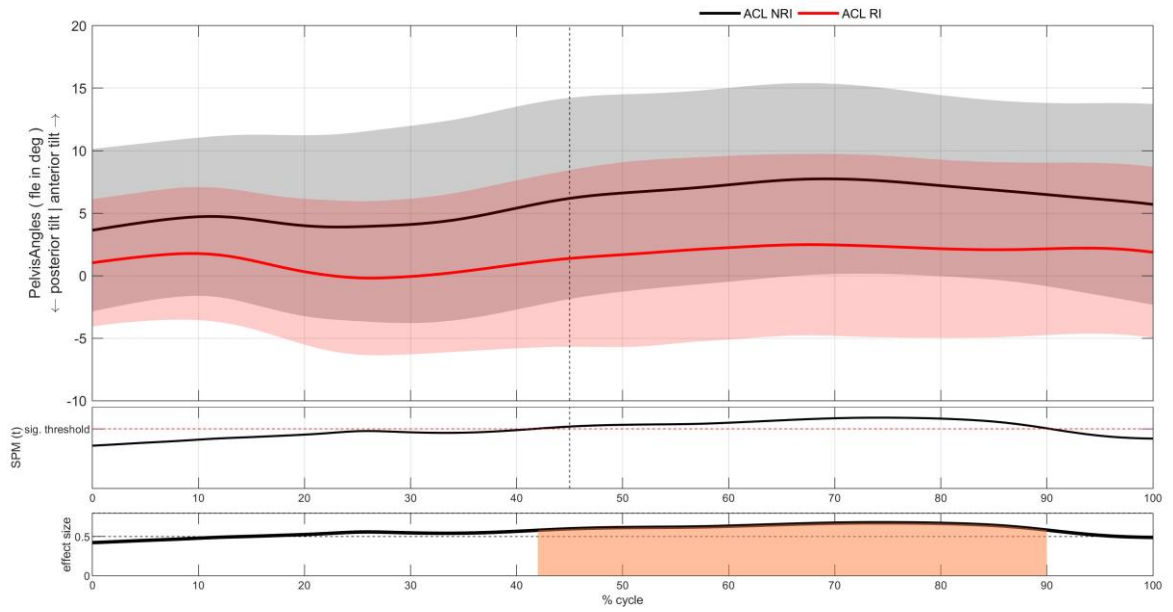

# Biomechanical Difference Between Limbs Between Groups

## Unplanned CoD

### COM to Knee Frontal

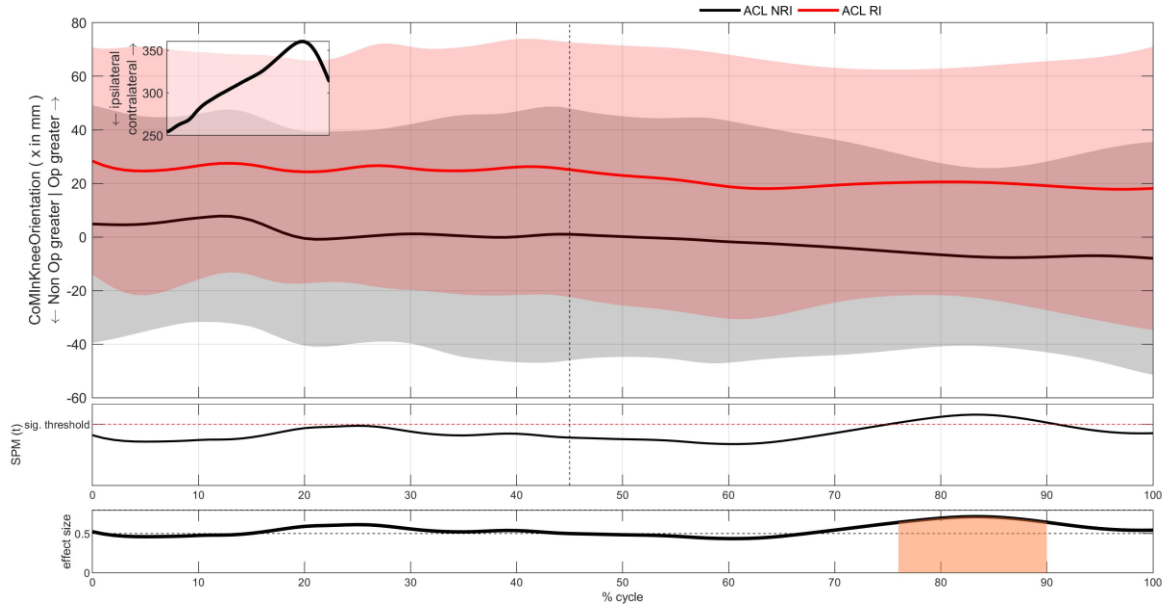

## Anterior Pelvic Tilt

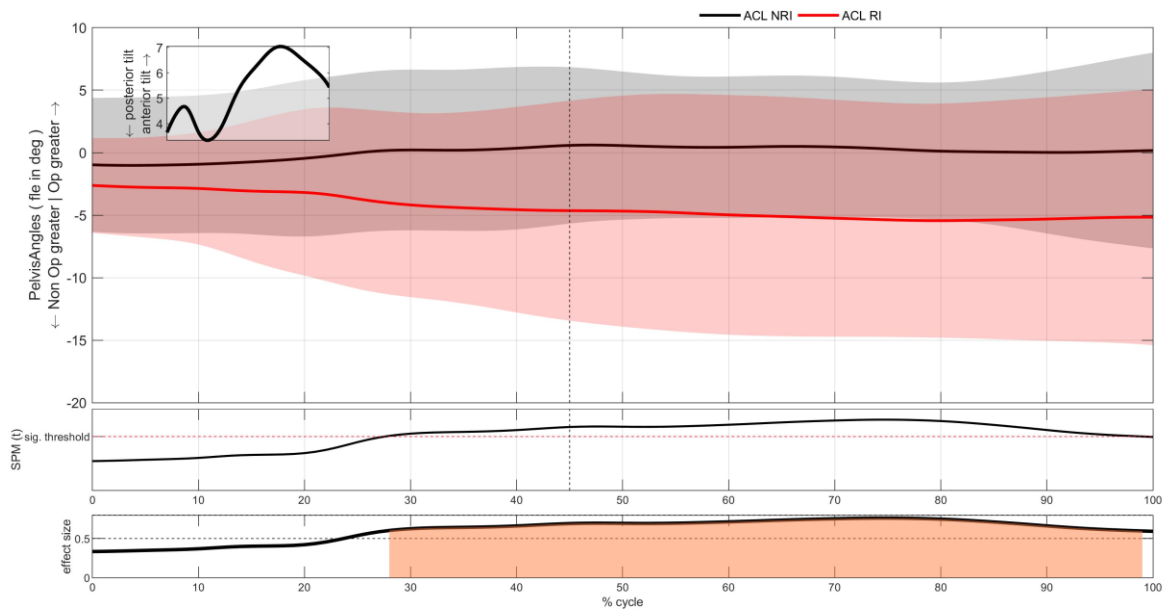

# Trunk to Pelvis Side Flexion

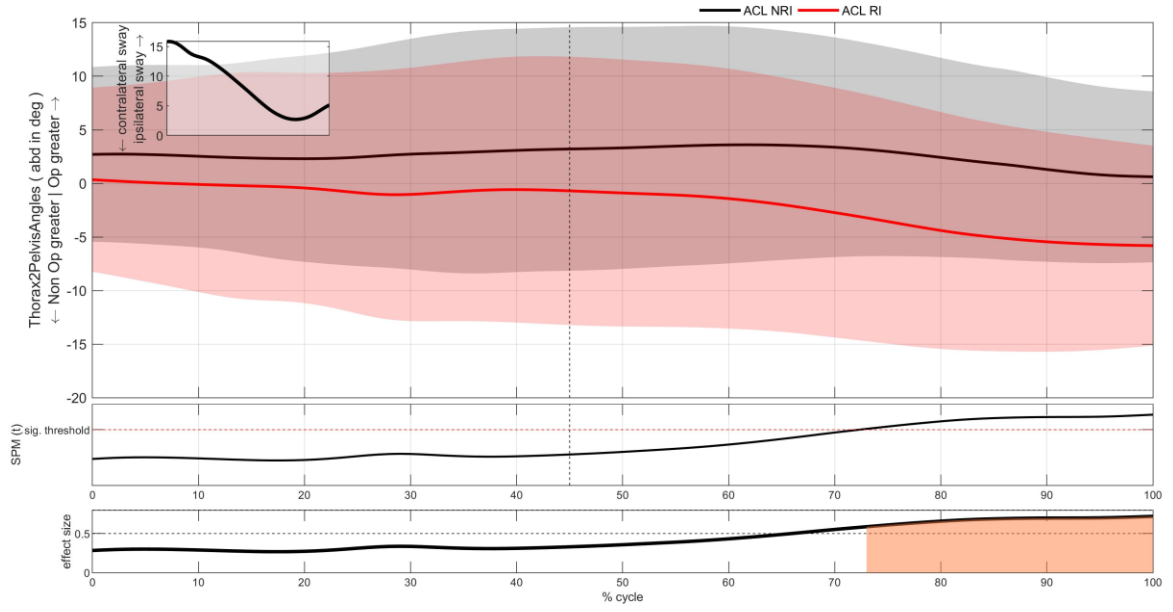

# COM to Ankle Frontal

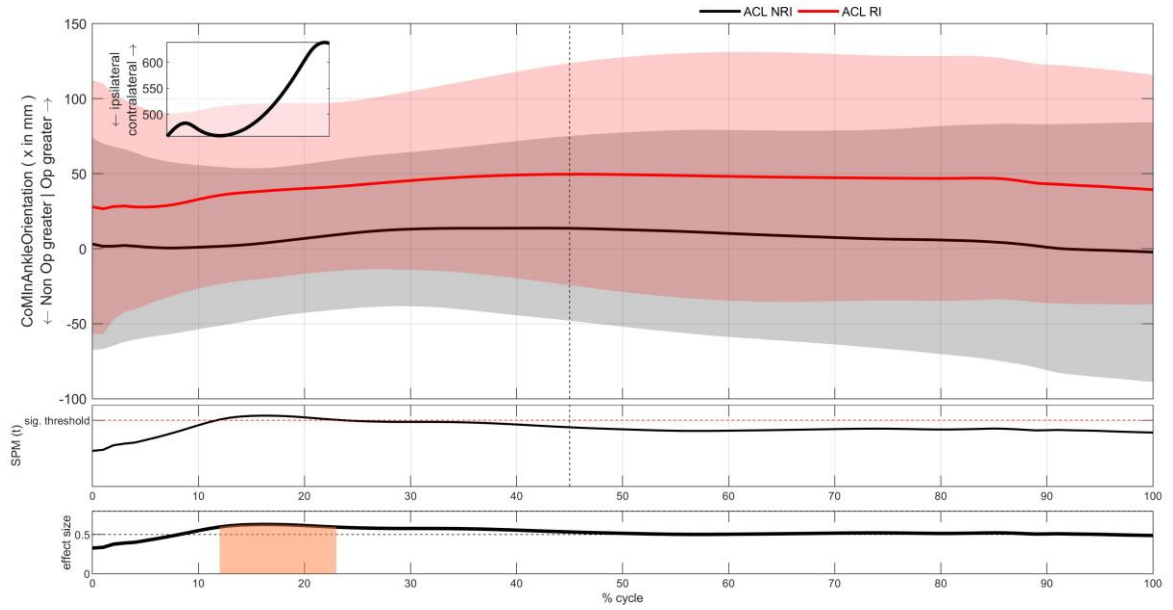

# Pelvic Drop

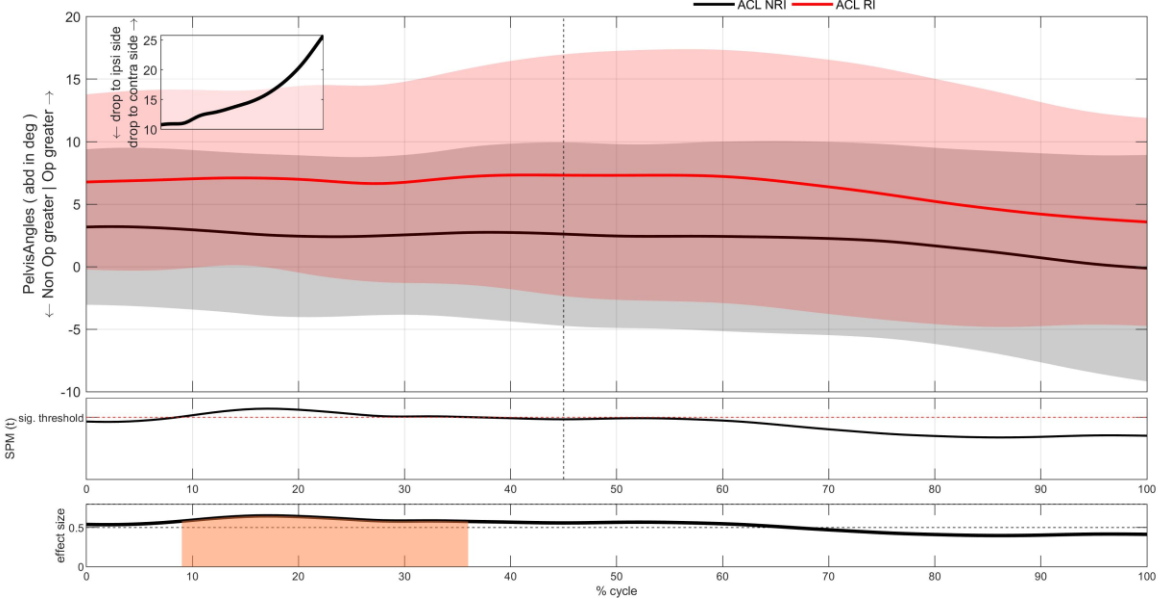

Supplement: NIHMS1842604-supplement-Appendix_A.pdf [file NIHMS1842604-supplement-Appendix_A.pdf]
